# Supplementary material for: Craniofacial characteristics of Syrian adolescents with Class II division 1 malocclusion: a retrospective study
Source: PeerJ. 2020 Jul 15;8:e9545. doi: 10.7717/peerj.9545 (PMC7368432; doi:10.7717/peerj.9545)
Supplement: Supplemental Information 6 [file peerj-08-9545-s006.xlsx]

## Sheet: Raw Data
ID	Age	Age_group	Gander	A_NP	SNA	Pog_NP	Cond_A	Cond_Gn	Max_Mand	ANS_Me	MP_FH	Facial_Axis	1U_AP	1L_APog	NLA	UL_NP	UPh	LPh	Anterior ratio	Overall ratio
1	11.83	1	M	-0.3	82.72	-13.8	80.16	98.84	18.68	64.77	34.26	-4.62	1.8	2.9	105.71	-0.26	6.75	9.91	82.86	93.69
2	13.91	1	M	3.95	76.34	-10.3	87.12	109.71	22.59	74.02	31.83	-12.63	5.88	5.18	108.87	-0.5	13.96	5.83	82.23	92.31
3	12.75	1	F	1.78	81	-4.7	81.45	108.87	27.42	72.08	39.59	-7.34	10.91	6.83	98.1	19.56	11.33	7.23	79.98	91.57
4	12.08	1	M	-3.15	80.3	-15.04	86.9	107.89	20.99	65.29	32.42	-3.11	6.29	7.44	107.73	5.09	8.28	13.41	81.9527	92.41
5	15.41	2	M	-2.26	75.38	-13.28	83.01	109.16	26.15	68.33	34.81	-10.1	3.37	4.14	114.7	4.33	12.14	13.05	76.67	89.99
6	14.75	2	F	2.42	81.66	-11.9	82.23	97.19	14.96	60.73	25.27	-1.14	3.65	7.6	99.11	11.48	7.34	14.19	84.7132	94.8892
7	14.58	2	F	-4.65	81.19	-23.29	81.8	104.22	22.42	72.11	40.54	-10.86	4.25	2.5	108.07	14.38	7.31	11.26	81.9077	92.18
8	12.5	1	F	1.22	81.01	-4.85	82.74	106.83	24.08	68.8	26.14	-0.82	7.7	4.63	89.8	26.41	8.22	6.96	75.6	89.14
9	13.16	1	M	-4.72	78.92	-13.33	83.17	106.87	23.7	65.33	31.44	-4.59	5.06	1.64	110.37	0.72	6.82	10.09	81.43	94.94
10	14.75	2	M	-4.46	79.82	-14.55	80.03	110.7	30.66	75.21	37.36	-14.04	3.52	3.97	101.74	5.89	13.4	9.25	79.08	91.5
11	12.33	1	M	-0.21	83.96	-10.38	83.73	101.76	18.03	59.87	25.94	-4.49	5.46	1.57	110.28	5.32	11.56	12.94	75.78	92.23
12	14.66	2	F	4.96	80.5	-1.23	82.96	112.12	29.16	70.74	36.71	-10.41	8.4	6.85	96.9	29.85	12.25	11.97	78.77	91.25
13	14.25	1	M	0.72	81.49	-7.44	93.79	112.17	18.37	66.95	22.02	1.36	9.18	6.52	97.5	20.8	13.5	14.53	76.4	89.71
14	17.16	2	M	-0.23	82.13	-8.5	80.94	109.97	29.03	70.6	22.54	-5.12	5.02	4.57	91.31	13.3	14.91	10.65	84.7985	95.6291
15	15.08	2	M	-0.78	81.07	-4.84	83.85	107.23	23.38	63.93	23.41	1.33	4.13	3.52	99.71	16.51	11.16	8.53	79.77	91.89
16	14.16	1	M	-4.27	76.63	-18.94	77.19	98.41	21.23	64.88	34.81	-11.38	4.71	6.46	105.83	14.95	8.13	12.54	79.904	92.7246
17	13.41	1	M	4.02	80.14	-8.27	91.52	105.49	13.97	66.63	21.59	-1.39	4.67	3.86	94.16	19.64	9.59	8.26	84.83	95.3875
18	17.25	2	M	-2.96	80.25	-16.59	89.23	117.68	28.45	79.4	31.03	-11.6	3.84	3.95	107.62	10.55	15.79	10.03	84.01	93.8658
19	14.16	1	F	0.33	81.25	-18.63	85.22	105.18	19.96	75.43	35.94	-9.27	8.36	9.28	103.35	20.38	14.88	15.91	76.6226	93.26
20	16.66	2	F	0.12	80.11	-10.09	84.79	110.13	25.35	65.85	26.99	-6.26	6.35	6.36	98.53	9.11	9.18	6.95	79.85	90.71
21	14.41	2	M	2.65	81.89	-4.76	92.42	115.67	23.25	73.57	22.09	-5.57	9.61	4.93	96.47	23.68	10.03	9.66	77.36	89.97
22	14.91	2	M	-0.98	74.69	-10.43	80.23	100.44	20.21	66.88	27.15	-11.96	5.67	2.57	107.27	2.57	8.21	7.18	78.5505	91.02
23	15.33	2	M	-1.03	75.43	-8.2	85.86	105.59	19.72	61.62	30.43	-4.59	6.16	3.92	106.82	10.16	14.67	13.74	77.64	93.53
24	17.08	2	F	1.42	83.39	-11.92	89.04	106.27	17.23	66.27	23.79	-7.21	4.07	4.78	100.33	8.37	14.12	12.1	78.45	90.88
25	13.5	1	F	1.02	82.92	-10.93	81.95	101.26	19.32	64.46	29.81	-6.15	4.11	4.02	114.78	4.66	8.54	13.09	79.3	93.07
26	15.58	2	F	1.03	83.41	-8.74	84.75	110.04	25.29	68.38	34.97	-7.79	6.84	6.25	97.13	9.06	12.49	10.3	78.84	90.63
27	14.66	2	F	1.28	79.57	-4.86	86.69	111.34	24.65	64.76	30.99	-2.23	6.46	3.8	95.36	11.2	16.86	16.25	80.22	93.54
28	14.08	1	F	1.43	83.37	-10.29	85.02	114.12	29.11	68.29	31.64	-7.06	3.25	4.1	107.32	7.6	14.48	16.13	84.75	94.08
29	15.16	2	F	0.81	84.48	-7.73	85.72	110.41	24.69	64.98	29.32	-5.07	9.12	6.97	106.48	4.02	14.45	10.16	83.6609	93.3743
30	11.91	1	F	3.94	84.61	-4.2	86.89	103.35	16.45	60.93	24.25	2.28	6.89	5.44	99.4	14.52	13.29	11.92	80.47	93.65
31	14.41	2	F	-0.91	82.19	-16.73	92.36	108.73	16.38	73.94	32.25	-5.72	5.38	2.83	118.32	2.29	13.46	10.48	81.15	92.32
32	12.83	1	F	-0.46	81.35	-16.97	87.81	110.96	23.15	69.27	35.68	-10.32	5.8	6.81	107.39	12.22	14.18	14.21	80.2065	94.25
33	14.16	1	F	1.33	85.21	-8.56	96.14	119.27	23.13	73.15	21.87	3.44	6.66	4.25	103.8	7.22	18.3	16.02	80.3591	92.6367
34	16.25	2	F	-2.3	75.8	-14.79	77.41	95.13	17.72	62.3	30.77	-6.88	6.49	7.42	106.25	20.77	10.75	8.75	80.406	94.86
35	14.5	2	M	0.71	80.7	-12.03	85.96	112.26	26.31	76.9	29.65	-8.65	6.95	7.87	107.82	9.95	5.74	6.82	83.4327	94.64
36	17	2	F	0.28	81.53	-11.27	84.06	113.93	29.86	73.62	29.79	-11.85	3.28	4.41	99.93	9.81	10.6	8.24	79.17	93.01
37	14.58	2	F	-1.33	76.28	-14.31	86.72	108.06	21.34	69.61	30.36	-8.59	3.44	5.03	106.07	11.1	11.73	12.06	85.368	95.09
38	16.08	2	F	-2.11	77.92	-11.51	85.11	102.44	17.33	55.54	17.49	-2.84	7.15	2.56	93.27	21.2	8.53	6.94	83.82	94.43
39	13.91	1	F	-0.03	78.13	-9.44	82.21	110.56	28.35	72.41	34.93	-9.3	5.93	3.13	119.21	1.9	12.09	8.52	80.31	93.53
40	14.16	1	F	1.76	80.23	-9.19	86.25	107.96	21.71	67.24	26.17	-4.1	6.81	6.36	119.91	5.67	15.91	15.15	85.1449	95.8003
41	14.25	1	F	-0.56	78.25	-19.11	86.69	103.87	17.18	71.42	39.49	-12.73	3.37	4.18	94.53	18.18	13.45	8.95	80.3917	92.0017
42	11.75	1	M	-0.47	80.88	-7.95	97.05	117.52	20.47	66.31	22.41	1.72	9.1	1.22	112.06	-0.04	9.63	11.09	83.4783	94.02
43	11.66	1	M	1.54	81.51	-9.49	88.72	113.62	24.9	73.92	30.02	-11.16	7.05	6	104.78	11.33	6.6	10.84	80.18	92.63
