# Supplementary material for: Craniofacial characteristics of Syrian adolescents with Class II division 1 malocclusion: a retrospective study
Source: PeerJ. 2020 Jul 15;8:e9545. doi: 10.7717/peerj.9545 (PMC7368432; doi:10.7717/peerj.9545)
Supplement: Supplemental Information 7 [file peerj-08-9545-s007.xlsx]

## Sheet: Sheet1
	16	15	14	13	12	11	21	22	23	24	25	26
	46	45	44	43	42	41	31	32	33	34	35	36
ID
1	10.92	6.94	7.38	7.72	6.39	8.41	8.63	6.29	7.78	7.14	7.02	10.77		82.8616	Anterior ratio
	11.73	7.21	7.11	6.7	6.07	5.98	5.86	6.04	6.82	6.98	7.17	11.7		93.6891	Overall ratio
2	10.23	6.25	6.55	7.59	6.52	8.76	8.76	6.6	7.47	6.74	6.28	10.33		82.2319	Anterior ratio
	10.65	6.72	6.22	6.91	6.12	5.86	5.81	6.05	6.83	6.39	6.78	10.66		92.311	Overall ratio
3	9.62	7.41	7.6	7.97	6.87	9.36	9.47	6.85	8.22	7.64	7.23	9.45		79.9754	Anterior ratio
	10.21	7.61	7.31	6.98	6.55	5.91	5.74	6.87	6.93	7.32	7.34	10.68		91.5652	Overall ratio
4	10.55	6.48	6.85	7.53	6.27	8.16	8.24	6.28	7.46	6.94	6.32	10.62		81.9527	Anterior ratio
	10.85	7.02	6.59	6.67	5.79	5.42	5.31	5.96	6.86	6.48	6.85	10.94		92.41	Overall ratio
5	10.43	7.23	7.49	8.23	7.11	9.24	9.12	7.16	8.31	7.6	7.53	10.58		76.6728	Anterior ratio
	11.12	7.38	7.68	7.28	6.29	5.34	5.33	6.29	7.17	7.28	7.54	11.32		89.993	Overall ratio
6	10.19	6.34	6.64	7.74	6.58	8.57	8.68	6.76	8.05	6.66	6.49	10.24		84.7132	Anterior ratio
	10.48	6.94	6.72	7.17	6.93	5.8	5.62	6.51	7.26	6.88	7.14	10.74		94.8892	Overall ratio
7	10.43	6.19	6.37	7.21	5.96	8.12	8.18	5.91	7.29	6.43	6.25	10.65		81.9077	Anterior ratio
	10.84	6.38	6.29	6.93	5.49	5.11	4.97	5.53	6.92	6.25	6.43	10.89		92.1789	Overall ratio
8	10.79	7.12	7.35	8.2	6.56	8.94	8.86	6.87	8.23	7.15	7.12	10.71		75.598	Anterior ratio
	11.04	7.54	7.17	6.99	5.75	5.35	5.39	5.68	6.87	7.14	7.32	11.03		89.142	Overall ratio
9	10.84	7.06	7.35	8.1	6.85	9.38	9.35	6.99	8.17	7.24	7.21	11.12		81.4292	Anterior ratio
	11.89	7.88	7.62	7.26	6.63	6.03	6.08	6.59	7.18	7.56	7.87	12.03		94.9428	Overall ratio
10	10.37	6.25	6.53	7.15	6.73	8.54	8.36	6.59	7.46	6.45	6.39	10.39		79.0765	Anterior ratio
	10.83	6.89	6.12	6.53	5.86	5.24	5.4	5.93	6.49	6.29	6.95	10.93		91.5031	Overall ratio
11	10.67	7.16	7.23	8.6	6.41	9.3	9.19	6.6	8.45	7.08	7.18	10.79		75.7775	Anterior ratio
	11.59	7.69	8.01	6.69	6.05	5.8	5.61	5.88	6.76	7.82	7.7	11.39		92.2258	Overall ratio
12	10.13	6.55	7.29	8.09	6.16	8.56	8.58	6.11	8.04	7.01	6.32	9.99		78.7659	Anterior ratio
	10.72	6.92	6.73	6.84	5.96	5.14	5.37	5.8	6.76	6.61	6.88	10.98		91.2528	Overall ratio
13	10.23	6.53	6.59	7.6	6.63	8.13	7.97	6.74	7.29	6.86	6.46	10.23		76.3977	Anterior ratio
	10.95	6.6	6.53	6.24	5.53	5.14	5.13	5.54	6.31	6.47	6.58	10.85		89.7107	Overall ratio
14	10.5	7.33	7.39	8.26	7.42	8.95	8.69	7.22	8.6	7.45	7.38	10.56		84.7985	Anterior ratio
	11.58	7.3	7.73	7.85	7.2	6	6.01	6.84	7.77	8.12	7.57	11.42		95.6291	Overall ratio
15	9.78	6.56	6.68	7.35	6.35	8.63	8.47	6.24	7.34	6.77	6.47	9.78		79.7657	Anterior ratio
	10.52	6.7	6.55	6.63	5.57	5.53	5.4	5.58	6.69	6.59	6.97	10.36		91.8934	Overall ratio
16	11.06	6.75	6.29	7.81	7.23	8.94	8.87	7.2	7.87	6.24	6.64	11.04		79.904	Anterior ratio
	10.99	7.34	6.87	6.83	6.6	5.61	5.81	6.66	6.78	7.16	7.23	11.08		92.7246	Overall ratio
17	10.32	6.68	6.98	7.33	6.34	7.97	8.12	6.48	7.61	6.72	6.57	10.37		84.8347	Anterior ratio
	11.22	6.79	6.93	6.55	6.26	5.78	5.89	6.23	6.49	7.03	6.69	11.41		95.3875	Overall ratio
18	10.12	6.45	6.92	7.73	6.53	8.44	8.25	6.35	7.85	6.68	6.47	10.48		84.0089	Anterior ratio
	11.41	6.14	6.78	7.01	6.22	5.87	5.7	6.13	7	6.79	6.31	11.25		93.8658	Overall ratio
19	9.98	6.78	6.75	8.46	6.27	9.28	9.25	6.92	8.2	7.03	6.8	10.04		76.6226	Anterior ratio
	11.34	7.49	7.25	6.5	6.15	5.87	5.99	6.18	6.38	7.31	7.49	11.36		93.2644	Overall ratio
20	10.48	7.27	7.69	8.61	7.12	9.41	9.26	7.18	8.7	7.83	7.59	10.54		79.8528	Anterior ratio
	11.06	7.68	7.19	7.27	6.67	6.08	6.19	6.61	7.33	7.38	7.47	11.3		90.7061	Overall ratio
21	10.93	7.49	7.76	8.29	6.53	9.61	9.38	6.16	8.26	7.44	7.34	10.43		77.3585	Anterior ratio
	11.35	7.54	7.19	6.79	6.05	5.68	5.87	6.12	6.8	7.5	7.51	11.23		89.9719	Overall ratio
22	10.12	6.56	6.86	7.53	6.34	8.54	8.45	6.23	7.34	6.67	6.22	10.08		78.5505	Anterior ratio
	10.41	6.94	6.52	6.45	5.65	5.28	5.31	5.67	6.54	6.53	6.82	10.65		91.0161	Overall ratio
23	9.68	6.41	7.12	8.27	7.42	9.35	9.22	7.28	8.33	7.15	6.56	9.74		77.6419	Anterior ratio
	10.96	7.34	7.39	6.95	6.33	6.02	5.84	6.62	6.96	7.48	7.18	11.21		93.5253	Overall ratio
24	10.82	6.91	7.12	7.89	6.79	8.12	8.33	6.3	7.67	7.35	6.95	11.01		78.4479	Anterior ratio
	10.73	7.52	7.36	6.9	5.74	5.13	4.97	5.52	7.12	7.27	7.34	10.97		90.8776	Overall ratio
25	10.44	6.79	7.2	7.79	6.71	8.44	8.5	6.6	7.94	7.26	6.82	10.7		79.2953	Anterior ratio
	11.27	7.39	7.52	6.9	5.7	5.66	5.58	5.75	6.87	7.49	7.3	11.16		93.0665	Overall ratio
26	10.62	6.59	6.52	7.83	6.48	9.01	8.94	6.42	7.91	6.22	6.54	10.65		78.8367	Anterior ratio
	10.43	6.97	6.84	6.99	5.97	5.43	5.48	5.82	7.04	6.63	6.87	10.48		90.6327	Overall ratio
27	10.41	6.22	6.78	7.65	6.75	8.06	8.09	6.93	7.57	6.82	6.61	10.77		80.222	Anterior ratio
	11.73	6.67	7.01	6.42	6.12	5.52	5.79	6.03	6.26	6.88	6.74	11.5		93.5355	Overall ratio
28	10.67	7.13	7.59	7.82	6.64	8.35	8.41	6.5	7.78	7.46	7.1	10.48		84.7473	Anterior ratio
	10.43	7.88	7.49	7.12	6.3	5.9	5.91	6.17	7.16	7.65	7.68	10.56		94.079	Overall ratio
29	10.76	6.82	7.18	7.37	6.47	8.88	8.84	6.44	7.29	7.02	6.69	10.57		83.6609	Anterior ratio
	11.19	7.02	6.94	6.82	6.2	5.94	5.93	6.11	6.89	6.51	7.05	11.48		93.3743	Overall ratio
30	9.98	6.72	7.27	8.08	6.48	8.65	8.62	6.56	8.06	7.13	6.59	9.96		80.4736	Anterior ratio
	10.97	7.14	7.47	7.06	6	5.66	5.59	5.98	7.09	7.44	7.03	10.69		93.6451	Overall ratio
31	9.9	7.4	7.84	8.32	7.1	9.12	9.37	7.03	8.18	7.59	7.25	9.95		81.1482	Anterior ratio
	10.75	7.39	7.54	7.23	6.49	6.12	6.11	6.62	7.29	7.47	7.76	10.67		92.317	Overall ratio
32	11.37	7.34	7.88	8.63	7.2	9.86	9.76	7.12	8.76	7.78	7.22	10.67		80.2065	Anterior ratio
	12.02	7.98	8.19	7.5	6.69	6.23	6.34	6.86	7.55	8.04	8.13	12.1		94.2465	Overall ratio
33	10.95	6.79	7.13	8.02	6.7	8.81	8.72	6.56	7.98	7.28	6.69	10.93		80.3591	Anterior ratio
	11.36	7.53	7.18	6.74	6.13	5.87	5.83	6.23	6.8	7.19	7.32	11.27		92.6367	Overall ratio
34	10.39	6.6	6.72	7.86	6.91	8.91	8.75	6.42	7.95	6.82	6.16	10.61		80.406	Anterior ratio
	11.45	7.37	7.28	6.9	6.31	5.9	5.56	6.18	6.78	7.08	7.17	11.28		94.8565	Overall ratio
35	10.75	7.12	7.26	8.02	6.44	8.27	8.13	6.43	7.98	7.25	7.04	10.7		83.4327	Anterior ratio
	11.69	7.37	7.21	6.98	6.09	5.89	5.88	6	6.93	7.18	7.25	11.81		94.643	Overall ratio
36	10.74	6.63	6.71	7.88	6.36	8.58	8.47	6.22	7.86	6.68	6.53	10.92		79.1713	Anterior ratio
	11.19	7.37	7.07	6.79	5.68	5.45	5.32	5.89	6.79	7.18	7.13	11.18		93.0113	Overall ratio
37	10.62	7.13	7.39	7.47	7.07	8.35	8.19	7.12	7.59	7.21	7.08	10.43		85.368	Anterior ratio
	11.25	7.16	7.55	7.27	6.76	5.81	5.79	6.36	7.1	7.38	7.24	11.28		95.0863	Overall ratio
38	10.23	6.78	7.26	8.16	6.64	8.69	8.73	6.76	8.24	7.34	6.83	10.23		83.8204	Anterior ratio
	11.15	7.27	7.1	7.34	6.43	6.12	6.06	6.32	7.31	7.21	7.18	11.06		94.4311	Overall ratio
39	10.37	6.88	7.53	8.27	6.6	8.75	8.81	6.76	8.4	7.18	6.73	10.31		80.311	Anterior ratio
	11.55	7.63	7.13	7.09	6.34	5.87	5.68	6.22	7.02	7.11	7.59	11.11		93.5294	Overall ratio
40	9.81	6.45	6.53	7.19	6.77	8.02	8.18	6.72	7.28	6.49	6.24	9.85		85.1449	Anterior ratio
	10.65	6.9	6.69	6.83	6.25	5.95	5.92	6.13	6.52	6.47	6.94	10.52		95.8003	Overall ratio
41	10.21	6.68	6.66	7.86	6.59	8.55	8.69	6.88	7.89	6.44	6.71	10.11		80.3917	Anterior ratio
	10.62	6.73	6.89	6.74	6.21	5.65	5.79	6.18	6.78	6.77	6.89	10.56		92.0017	Overall ratio
42	9.41	6.88	7.26	8.19	6.59	8.55	8.69	6.88	8.25	7.14	6.91	9.29		83.4783	Anterior ratio
	10.73	6.73	7.09	7.31	6.63	5.87	5.76	6.57	7.22	7.1	6.89	10.52		94.0238	Overall ratio
43	10.21	6.83	6.73	7.91	6.76	8.68	8.69	6.92	7.86	6.45	6.78	10.21		80.1794	Anterior ratio
	10.96	6.87	6.77	6.73	6.31	5.71	5.8	6.24	6.75	6.98	6.99	10.99		92.63	Overall ratio
